# Supplementary material for: Targeted knockdown of the adenosine A2A receptor by lipid NPs rescues the chemotaxis of head and neck cancer memory T cells
Source: PubMed Central journal article supplement — Mol Ther Methods Clin Dev. 2021 Mar 4;21:133–43. doi: 10.1016/j.omtm.2021.03.001 (PMC8005736; doi:10.1016/j.omtm.2021.03.001), 2021-03-04
Supplement: mmc1.pdf [file mmc1.pdf]

**OMTM, Volume 21**

**Supplemental information**

**Targeted knockdown of the adenosine A<sub>2A</sub>  
receptor by lipid NPs rescues the chemotaxis  
of head and neck cancer memory T cells**

**Hannah S. Newton, Ameet A. Chimote, Michael J. Arnold, Trisha M. Wise-Draper, and Laura Conforti**

## Supplemental Material

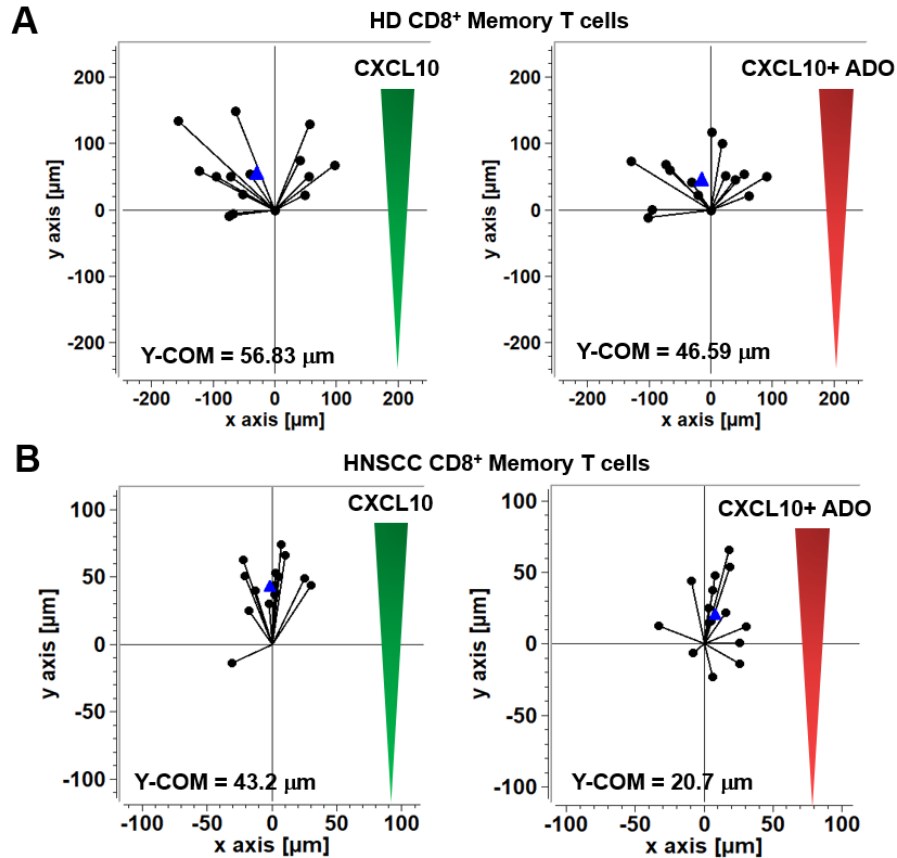

**Figure S1. Adenosine does not inhibit chemotaxis in HD CD8<sup>+</sup> memory T cells but does inhibit chemotaxis in HNSCC CD8<sup>+</sup> memory T cells. (A and B) Trajectories of CD8<sup>+</sup> memory T cells migrating along the CXCL10 gradient (green triangle) or CXCL10+adenosine (ADO) gradient (blue triangle) in (A) HD and (B) HNSCC samples. Trajectories are artificially set to start at the origin with the blue triangle representing the Y-COM. The same experiment was performed in CD8<sup>+</sup> memory T cells isolated from two independent HDs and two independent HNSCC patients. Shown here are the trajectories of migrating cells from a representative single HD and representative single HNSCC patient. Trajectories of 10-15 cells were calculated for each condition for each experiment.**

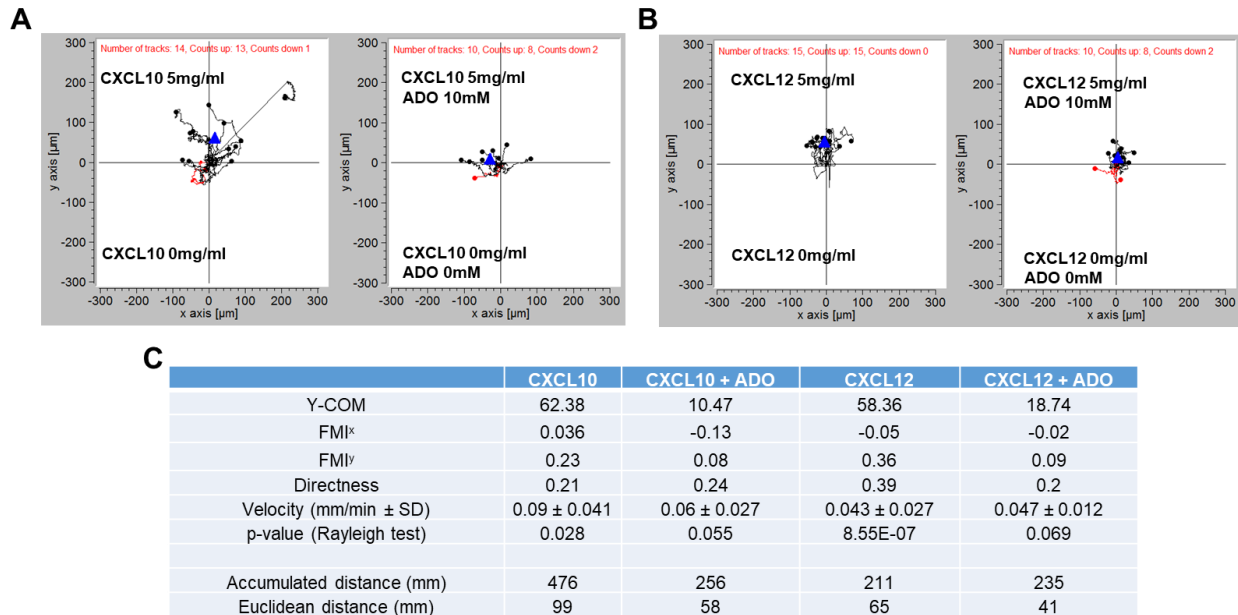

**Figure S2. The effect of adenosine is the same on T cell chemotaxis towards CXCL10 and CXCL12. (A)** Representative trajectories of T cells migrating along the CXCL10 gradient or CXCL10+adenosine (ADO) gradient in HD CD3<sup>+</sup> T cells. Trajectories are artificially set to start at the origin with the blue triangle representing the Y-COM. **(B)** Representative trajectories of T cells migrating along the CXCL12 gradient or CXCL12+adenosine (ADO) gradient in HD CD3<sup>+</sup> T cells. Trajectories are artificially set to start at the origin with the blue triangle representing the Y-COM. **(C)** Chemotactic parameters for HD CD3<sup>+</sup> T cells in migration media with CXCL10±ADO versus CXCL12±ADO. (n = 1 patient; 10-15 cells per condition).

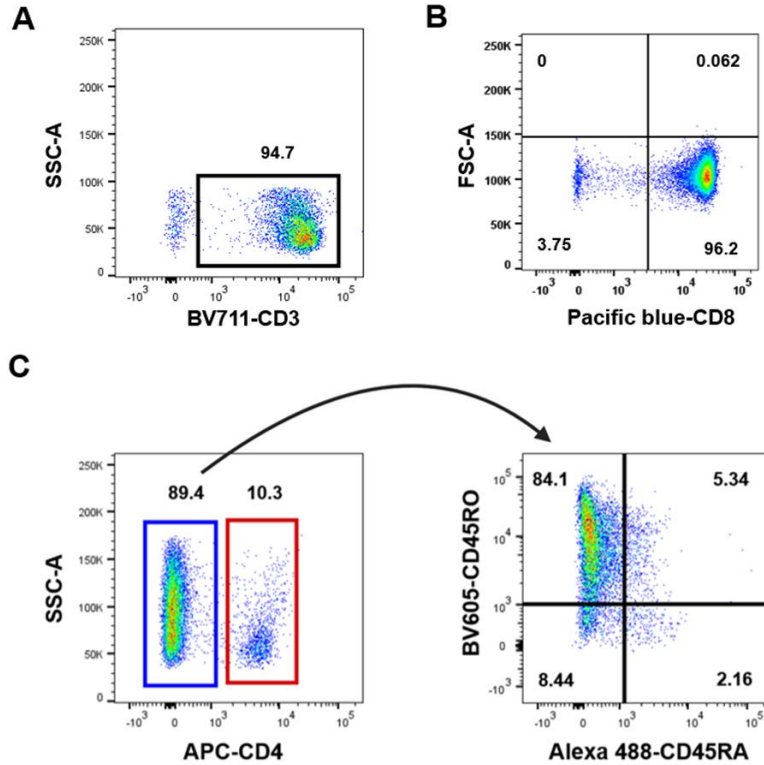

**Figure S3. Purity of T cell populations used in the study.** (A and B)  $CD3^+$  and  $CD8^+$  T cell populations were enriched by negative selection from HD PBMCs using EasySep Human T cell and Human  $CD8^+$  T cell enrichment kits respectively (StemCell Technologies) as per the manufacturer's instructions. The purity of the enriched cell  $CD3^+$  (A) and  $CD8^+$  (B) T cell fractions were assessed by flow cytometry. (C)  $CD8^+$  memory T cell population was enriched using the EasySep Human Memory  $CD8^+$  T Cell Enrichment Kit (StemCell Technologies) as per the manufacturer's instructions. This kit enriches  $CD8^+$  memory T cells ( $CD8^+CD45RA^-CD45RO^+$ ) from human PBMCs by targeting non-memory  $CD8^+$  T cells for removal with antibodies recognizing specific cell surface markers. The  $CD8^+$  memory T cell content in the enriched fraction was evaluated by flow cytometry and was defined as cells that were  $CD8^+CD45RO^+CD45RA^-$ . In panel (C), the  $CD4^+$  population from the enriched cells were defined as the  $CD8^+$  population. All experiments were performed in two independent donors and shown here are representative scatter plots showing the purity of the enriched  $CD3^+$ ,  $CD8^+$  and  $CD8^+$  memory T cells from one HD.
