# Supplementary material for: Targeted knockdown of the adenosine A2A receptor by lipid NPs rescues the chemotaxis of head and neck cancer memory T cells
Source: PubMed Central journal article supplement — Mol Ther Methods Clin Dev. 2021 Mar 4;21:133–43. doi: 10.1016/j.omtm.2021.03.001 (PMC8005736; doi:10.1016/j.omtm.2021.03.001), 2021-03-04
Supplement: mmc2.pdf [file mmc2.pdf]

# Targeted knockdown of the adenosine A<sub>2A</sub> receptor by lipid NPs rescues the chemotaxis of head and neck cancer memory T cells

Hannah S. Newton,<sup>1</sup> Ameet A. Chimote,<sup>1</sup> Michael J. Arnold,<sup>1</sup> Trisha M. Wise-Draper,<sup>2</sup> and Laura Conforti<sup>1</sup>

<sup>1</sup>Department of Internal Medicine, Division of Nephrology, University of Cincinnati College of Medicine, Cincinnati, OH, USA; <sup>2</sup>Department of Internal Medicine, Division of Hematology/Oncology, University of Cincinnati College of Medicine, Cincinnati, OH, USA

**In solid malignancies, including head and neck squamous cell carcinoma (HNSCC), the immunosuppressive molecule adenosine, which accumulates in the tumor, suppresses cytotoxic CD8<sup>+</sup> T cell functions including chemotaxis and tumor infiltration. Adenosine functions through binding to the adenosine A<sub>2A</sub> receptor (A<sub>2A</sub>R) present on T cells. In order to increase T cell migration into the tumor, the negative effect of adenosine must be abrogated. Systemic drug treatments targeting A<sub>2A</sub>R are available; however, they could lead to negative toxicities due to the broad expression of this receptor. Herein, we developed a lipid nanoparticle (NP)-based targeted delivery approach to knock down A<sub>2A</sub>R in T cells in order to increase their chemotaxis in the presence of adenosine. By using flow cytometry, immunofluorescence, qRT-PCR, and 3D-chemotaxis, we demonstrated that CD45RO-labeled nanoparticles delivering *ADORA2A* gene-silencing-RNAs decreased *ADORA2A* mRNA expression and rescued the chemotaxis of HNSCC CD8<sup>+</sup> memory T cells. Overall, the data indicate that targeting the adenosine signaling pathway with lipid NPs is successful at suppressing the inhibitory effect of adenosine on the chemotaxis of HNSCC memory T cells, which could ultimately help increase T cell infiltration into the tumor.**

## INTRODUCTION

The immune system plays a critical role in the control of cancer development. CD8<sup>+</sup> cytotoxic memory T cells in particular are key in eliminating cancer cells.<sup>1</sup> High CD8<sup>+</sup> T cell infiltration into the tumor is, in fact, associated with a favorable prognosis and response to immunotherapy.<sup>2,3</sup> However, in many solid malignancies, such as head and neck squamous cell carcinoma (HNSCC), the immune system fails in part due to the limited ability of cytotoxic T cells to infiltrate the tumor microenvironment (TME).<sup>4–6</sup> Thus, it is important to develop new therapeutic approaches that improve cytotoxic T cell tumor infiltration.

Adenosine, an immunosuppressive purine nucleoside, which accumulates in the TME, suppresses T cell function including chemotaxis.<sup>7–10</sup> Indeed, the presence of adenosine-generating ecto-nucleosidase CD73 (indicative of adenosine accumulation) in the TME is associated with a poor prognosis.<sup>11</sup> Adenosine binds to an array of adenosine receptors (A<sub>1</sub>, A<sub>2A</sub>, A<sub>2B</sub>, A<sub>3</sub>) including the adenosine A<sub>2A</sub> receptor (A<sub>2A</sub>R),

which initiates a signaling cascade that culminates with the inhibition of KCa3.1, a Ca<sup>2+</sup>-dependent K<sup>+</sup> channel that controls human T cell migration.<sup>9,12</sup> In addition to inhibiting chemotaxis, adenosine suppresses other anti-tumor functions of T cells such as the production of interferon- $\gamma$  (IFN- $\gamma$ ).<sup>10,13–15</sup> Importantly, the inhibitory effect of adenosine is particularly potent in circulating CD8<sup>+</sup> T cells of HNSCC patients due to an increased sensitivity to adenosine, in part, conferred by a defect in KCa3.1, which ultimately limits tumor infiltration.<sup>6,13</sup>

One approach that could improve T cell migration and function in the TME, and ultimately enhance the response to immune checkpoint inhibitors and adoptive T cell therapies, is to target the adenosine signaling pathway.<sup>11,16–20</sup> Many studies have shown that targeting A<sub>2A</sub>R (through either pharmacological inhibition or genetic deletion) increases cytotoxic T cell function and decreases tumor burden.<sup>4,11,14,18,21</sup> A<sub>2A</sub>R blockade has also been shown to enhance the efficacy of immune checkpoint inhibitors—immunotherapies that are associated with a high degree of resistance.<sup>19,22</sup> The efficacy of a therapeutic approach targeting A<sub>2A</sub>R has been established in a phase I clinical trial where renal cell carcinoma patients were treated with an A<sub>2A</sub>R antagonist (ciforadenant) alone and in combination with the immune checkpoint inhibitor programmed cell death ligand 1 (anti-PD-L1) antibody.<sup>22</sup> In this study, clinical responses (decreased tumor burden and increased survival) were reported for treatment combinations with some degree of associated toxicity.<sup>22</sup> Durable responses were also associated with increased CD8<sup>+</sup> T cell tumor infiltration.<sup>22</sup>

Despite these great successes of targeting A<sub>2A</sub>R in cancer, systemic pharmacological approaches come with limitations. The adenosine signaling pathway is important in many cellular processes including the prevention of overactivation of the immune system in inflammatory settings and thus A<sub>2A</sub>R is expressed in many different immune cells.<sup>9,23</sup> Additionally, A<sub>2A</sub>R is expressed in other tissues including vasculature, platelets, and brain striatum.<sup>24,25</sup> Thus, A<sub>2A</sub>R signaling

Received 5 October 2020; accepted 1 March 2021;  
<https://doi.org/10.1016/j.omtm.2021.03.001>

**Correspondence:** Laura Conforti, Department of Internal Medicine, Division of Nephrology, University of Cincinnati College of Medicine, Cincinnati, OH, USA.  
**E-mail:** [laura.conforti@uc.edu](mailto:laura.conforti@uc.edu)

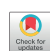

is also necessary for proper blood circulation, angiogenesis, and inhibition of platelet aggregation, as well as central nervous system regulation of motor activity and behavior.<sup>23–27</sup> In fact, adenosine and A<sub>2A</sub>R agonists have been used in many clinical trials; examples include protection from post-operative liver ischemia, treatment of sickle cell anemia, and reduction of reperfusion injury due to coronary stenting.<sup>24,25</sup> Therefore, a targeted delivery approach may allow for increased targeted dosage and resultant efficacy without increased toxicity compared to systemic pharmacological A<sub>2A</sub>R blockers.

One type of targeted delivery approach that has shown great clinical promise in different disease settings is the use of lipid nanoparticles (NPs).<sup>28–30</sup> Lipid NPs are small particles constructed with different phospholipids that can be functionalized to target specific cell types and utilized for targeted drug delivery and gene therapy.<sup>31</sup> *In vivo* murine studies with drugs and small interfering/silencing RNAs (siRNAs) delivered via lipid NPs have emphasized treatment specificity and reduction in off-target effects.<sup>28,29,32,33</sup> Furthermore, we have developed lipid NPs that target CD45RO<sup>+</sup> memory T cells and successfully deliver siRNAs against the target gene.<sup>34,35</sup>

Thus, in this study we investigated whether lipid NPs functionalized with either anti-CD8 or anti-CD45RO antibodies could effectively deliver siRNAs against *ADORA2A* (the gene encoding the A<sub>2A</sub>R) to the targeted T cells, block the adenosine signaling pathway, and rescue the chemotactic ability of these cells. CD45RO-labeled NPs are a reasonable alternative to CD8-labeled NPs as CD8<sup>+</sup> CD45RO<sup>+</sup> T cells make up about 90% of T cells in the tumor.<sup>5</sup> We determined that, although CD8-labeled NPs were specific for CD8<sup>+</sup> T cells, these NPs were unsuccessful at knocking down *ADORA2A* mRNA expression because they were more quickly internalized into the lysosome. Instead, CD45RO-labeled NPs escaped lysosome internalization and successfully knocked down *ADORA2A* mRNA expression and restored memory T cell chemotaxis in an adenosine-rich tumor-like microenvironment.

## RESULTS

### ***ADORA2A* siRNAs knocked down A<sub>2A</sub>R expression in healthy donor T cells**

The goal of this investigation was to knock down the A<sub>2A</sub>R in specific T cell subsets by targeted delivery of *ADORA2A* siRNAs via functionalized lipid NPs. The composition and structure of the lipid NPs that were loaded with *ADORA2A* siRNAs are shown in Figure 1A. Experiments were thus performed to verify that the *ADORA2A* siRNAs were incorporated into the NPs could knock down A<sub>2A</sub>R in treated cells. Activated healthy donor (HD) T cells were transfected with 10 nM *ADORA2A* siRNAs; scramble sequence RNAs (scr-RNAs) served as controls. *ADORA2A* mRNA levels were determined via quantitative reverse-transcriptase polymerase chain reaction (qRT-PCR). 24 h post-transfection, *ADORA2A* mRNA levels decreased by 65% in the *ADORA2A* siRNA-treated cells as compared to the scr control (Figure 1B). Additionally, A<sub>2A</sub>R protein levels were measured via flow cytometry 24–72 h post-transfection (Figures 1C and 1D). The degree of A<sub>2A</sub>R knockdown (fold change of normalized A<sub>2A</sub>R MFI in

*ADORA2A* siRNA-treated cells to scr-RNA-treated cells) varied greatly in time among different donors with some individuals reaching the greatest degree of knockdown at 24 h post-transfection while others had the greatest degree of knockdown at 48 and 72 h (Figure 1C, left). Overall, when greatest degrees of A<sub>2A</sub>R knockdown (fold change less than one) were compiled for each sample within the 24–72 h time frame, the A<sub>2A</sub>R protein expression was significantly decreased in the *ADORA2A* siRNA-treated cells (Figure 1C, right). The gating strategy for the flow cytometry experiments and representative histograms are shown in Figure 1D; the specificity of the A<sub>2A</sub>R antibody is shown in Figure 1E. In this set of experiments, we tested both CD8<sup>+</sup> T cells and a mixed population of CD3<sup>+</sup> T cells. We observed a comparable inhibition of *ADORA2A* mRNA expression by *ADORA2A* siRNAs in these two groups (67.8% ± 2.0% for CD3<sup>+</sup> T cells, n = 3, and 61.6% ± 0.1% in CD8<sup>+</sup> T cells, n = 2). The average data shown in Figure 1B comprises both cell types. For the effect on A<sub>2A</sub>R protein levels, we observed a time-dependent effect in both groups. The two experiments with CD8<sup>+</sup> T cells in Figure 1C are reported in yellow and green. Overall, these data showed that *ADORA2A* siRNAs were effective at knocking down A<sub>2A</sub>R expression.

### **CD8-targeting NPs are trapped in the lysosome and fail to deliver siRNAs to T cells**

Once the *ADORA2A* siRNAs were validated, we proceeded to determine whether CD8-NPs specifically bound to and entered CD8<sup>+</sup> T cells, and then delivered the intact siRNA content capable of ultimately decreasing *ADORA2A* expression. In order to determine the specificity of the CD8-NPs for CD8<sup>+</sup> T cells, CD3<sup>+</sup> T cells isolated from the blood of HDs via negative selection were incubated with fluorescently tagged empty (no siRNAs) CD8-NPs overnight, stained with an anti-CD4 antibody, and analyzed via flow cytometry (Figure 2A). Overall, it was determined that 94% of the CD8-NPs were bound to the CD4<sup>+</sup> T cells, i.e., CD8<sup>+</sup> cytotoxic T cells, as seen in the comparison of the percentage of fluorescent NPs attached to CD4<sup>+</sup> T cells in quadrant 1 versus the percentage of fluorescent NPs attached to CD4<sup>+</sup> T cells in quadrant 2 (Figure 2B). Furthermore, about 86% of CD4<sup>+</sup> T cells had CD8-NPs either bound to their membrane or incorporated into the cells while only 1.7% of CD4<sup>+</sup> T cells were positive for CD8-NPs (Figure 2C). Therefore, we determined that not only were the CD8-NPs specific for CD4<sup>+</sup> T cells but they also were bound to/ incorporated into the majority of the CD4<sup>+</sup> T cells. In order to ensure that the CD8-NPs bound to CD8<sup>+</sup> T cells due to the CD8<sup>+</sup> label rather than non-specific binding of the NPs to the cells due to their liposomal structure, fluorescent NPs were labeled with an isotype-specific immunoglobulin G (IgG) antibody (IgG-NPs; thus having no cellular target) and were incubated with CD3<sup>+</sup> T cells. It was determined that IgG-NPs did not bind to any cells in the CD3<sup>+</sup> mixed T cell population (Figure 2D) indicating that CD8-NPs needed the CD8 antibody label in order to bind to CD8<sup>+</sup> T cells. This indicated that the CD8-NPs were specific for CD8<sup>+</sup> T cells and that the majority of CD8<sup>+</sup> T cells had bound CD8-NPs.

We then tested whether the CD8-NPs could effectively deliver intact *ADORA2A* siRNAs to CD8<sup>+</sup> T cells and knock down *ADORA2A*

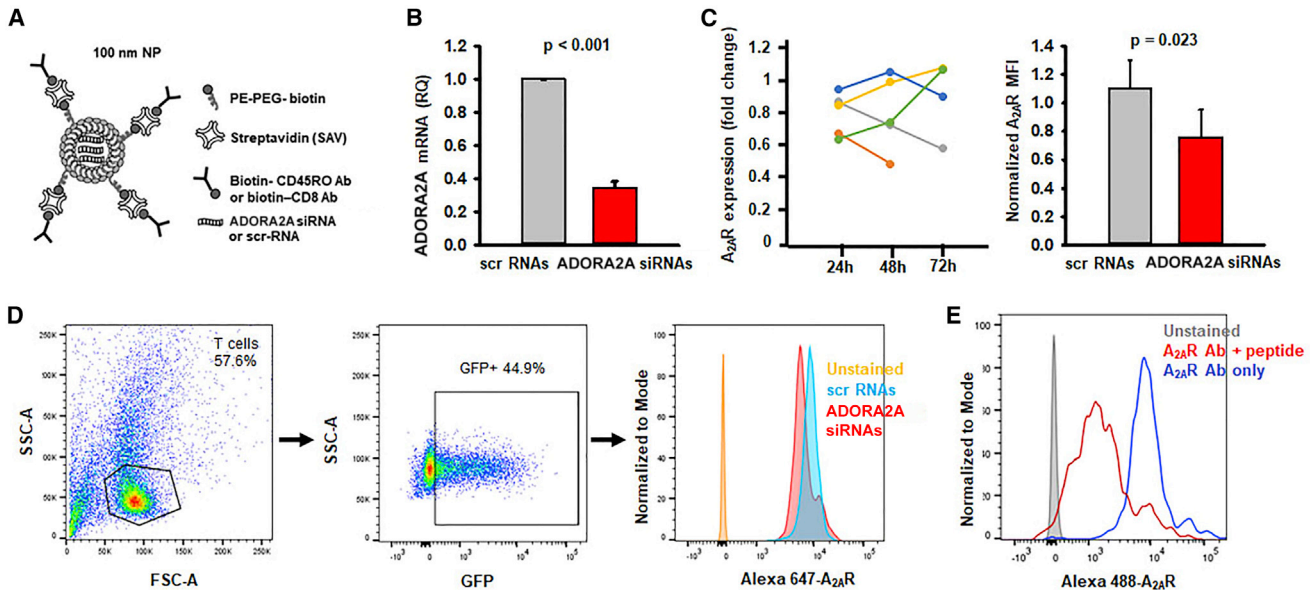

**Figure 1. *ADORA2A* siRNAs decrease *ADORA2A* mRNA and  $A_{2A}R$  protein expression**

(A) Representation of the structure of the lipid NPs labeled with fluorescent streptavidin and biotinylated targeting antibody and loaded with siRNAs. PE: phosphoethanolamine; PEG: polyethylene glycol (B) Relative quantity (RQ) of *ADORA2A* mRNA expression in activated HD CD3<sup>+</sup> or CD8<sup>+</sup> T cells 24 h post-transfection with 10 nM scr or *ADORA2A* siRNAs (n = 5; 3 CD3<sup>+</sup> T cell samples, 2 CD8<sup>+</sup> T cell samples). *GAPDH* (Glyceraldehyde 3-phosphate dehydrogenase) was used as the reference gene. Data are shown as mean  $\pm$  standard deviation and significance is determined by a paired Student's t test. (C) (Left) Fold change of normalized  $A_{2A}R$  protein expression in activated HD CD3<sup>+</sup> or CD8<sup>+</sup> T cells 24 h (n = 5; 3 CD3<sup>+</sup> T cell samples, 2 CD8<sup>+</sup> T cell samples), 48 h (n = 5; 3 CD3<sup>+</sup> T cell samples, 2 CD8<sup>+</sup> T cell samples), or 72 h (n = 4; 2 CD3<sup>+</sup> T cell samples, 2 CD8<sup>+</sup> T cell samples) post-transfection with 10 nM *ADORA2A* siRNAs as compared to scr-RNAs. (Right) The normalized MFI of  $A_{2A}R$  expression showing the highest degree of  $A_{2A}R$  protein knockdown post-transfection with 10 nM *ADORA2A* siRNAs as compared to corresponding scr-RNAs for each individual sample regardless of time point at which knockdown occurred. Data are shown as mean  $\pm$  standard error of the mean (n = 5). Data are compared using a paired Student's t test. (D) Flow cytometry gating strategy for determining  $A_{2A}R$  expression in transfected cells. The cells were first gated on T lymphocytes and then on GFP fluorescence (indicating that the cells were successfully transfected with siRNAs) to determine  $A_{2A}R$  expression. The unstained sample is indicated in orange in the histogram while the  $A_{2A}R$  expression of cells treated with scr-RNAs is indicated in blue and the  $A_{2A}R$  expression of cells treated with *ADORA2A* siRNAs is indicated in red. (E) Representative histogram showing  $A_{2A}R$  antibody specificity where CD3<sup>+</sup> T cells were stained with  $A_{2A}R$  antibody  $\pm$  peptide followed by secondary antibody. Unstained cells are indicated in gray,  $A_{2A}R$  antibody + peptide is indicated in red and  $A_{2A}R$  antibody alone is indicated in blue. Shown here is a representative experiment from two identical experiments performed in HDs.

mRNA expression. To this effect, HD CD8<sup>+</sup> T cells were incubated with CD8-NPs loaded with either scr-RNAs or *ADORA2A* siRNAs: CD8(scr)-NPs or CD8( $A_{2A}R$ )-NPs, respectively, and activated for 48–72 h. In parallel, we conducted experiments using CD45RO-NPs loaded with *ADORA2A* siRNAs (CD45RO( $A_{2A}R$ )-NPs) as a positive control. Our laboratory has previously shown that CD45RO-NPs are specific to CD45RO<sup>+</sup> T cells, are internalized by the cells and release intact siRNA contents capable of knocking down the target gene.<sup>34,35</sup> CD8( $A_{2A}R$ )-NPs did not reduce *ADORA2A* mRNA expression as compared to CD8(scr)-NPs (Figure 3A). Thus, CD8-NPs do not serve as good delivery system for siRNAs. However, CD45RO( $A_{2A}R$ )-NPs reduced *ADORA2A* mRNA expression by 57% as compared to CD45RO(scr)-NPs (Figure 3B). This effect was comparable to the 65% knockdown obtained by the transfection of naked siRNAs (Figure 1B) indicating that the CD45RO( $A_{2A}R$ )-NPs were successful at knocking down *ADORA2A* mRNA expression.

We then determined the reason for the inability of the CD8-NPs to successfully deliver intercellular siRNAs compared to CD45RO-NPs. Immunofluorescence was used to determine the localization of the

CD8-NPs and CD45RO-NPs in the lysosome at 24 h. We determined that CD8-NPs had a higher percentage of localization in the lysosome than the CD45RO-NPs (Figures 4A and 4B). This indicated that at 24 h, a larger percentage of CD8-NPs were already degraded in the lysosome as compared to CD45RO-NPs and therefore CD8-NPs likely did not have time to release the *ADORA2A* siRNA contents into the cell. Therefore, CD45RO-NPs serve as better delivery systems for siRNAs and were utilized for subsequent experiments.

#### CD45RO-targeting NPs loaded with *ADORA2A*siRNAs rescue adenosine-mediated inhibition of HNSCC T cell chemotaxis

Because CD45RO( $A_{2A}R$ )-NPs were successful at knocking down *ADORA2A* mRNA expression, we proceeded to determine whether these NPs could rescue the chemotactic ability of CD8<sup>+</sup> memory T cells from HNSCC patients in the presence of adenosine. Circulating CD8<sup>+</sup> T cells in HNSCC patients are highly sensitive to adenosine that blocks their chemotaxis by 80%.<sup>6</sup> This process reduces the number of CD8<sup>+</sup> T cells that infiltrate the tumor.<sup>6</sup> CD8<sup>+</sup> CD45RO<sup>+</sup> T cells make up about 90% of the cells that infiltrate solid tumors; therefore,

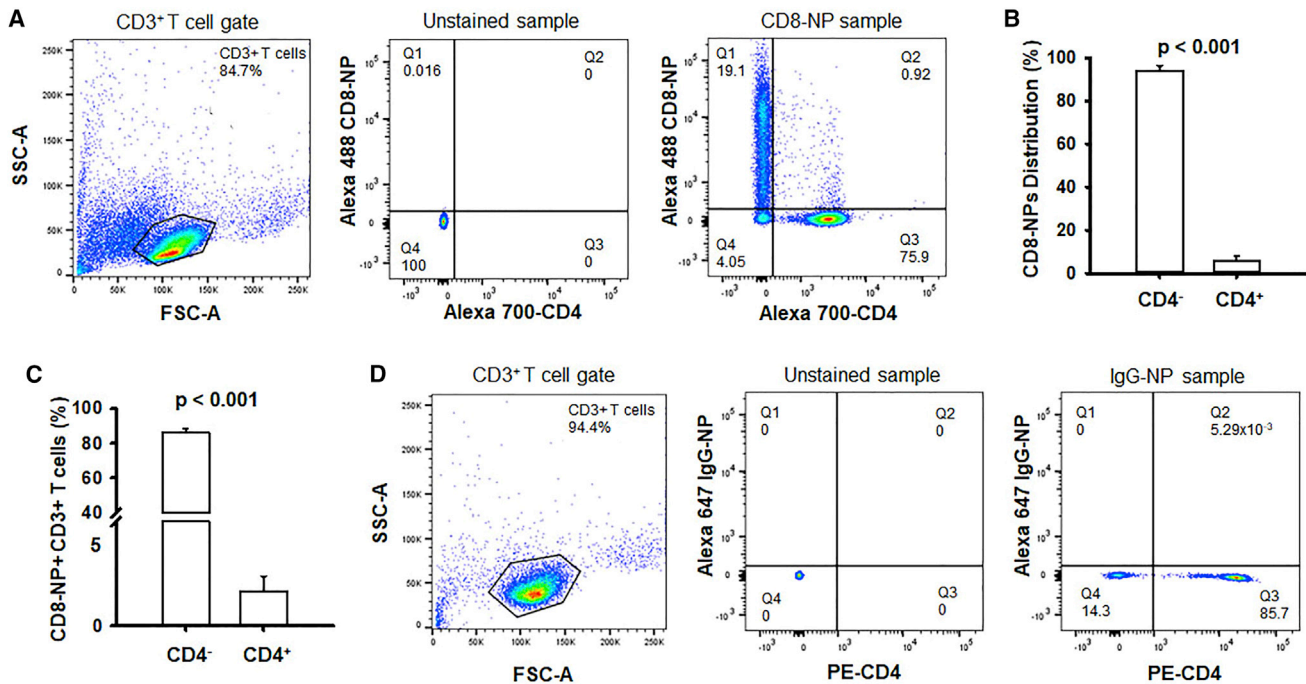

**Figure 2. CD8-NPs are specific toward CD8<sup>+</sup> T cells**

(A) Flow cytometry gating strategy for determining specificity of CD8-NPs for CD8<sup>+</sup> T cells. Cells were first gated based on the CD3<sup>+</sup> lymphocyte population (left). The unstained sample was then used to determine the quadrant gate placement for the CD4 stain and NP fluorescence (middle). A representative plot for the distribution of CD8-NPs in CD4<sup>-</sup> and CD4<sup>+</sup> T cells is shown on the right. Quadrant 1 represents the CD4<sup>-</sup> T cells that are positive for CD8-NPs. Quadrant 2 represents the CD4<sup>+</sup> T cells that are positive for CD8-NPs. Quadrant 3 represents CD4<sup>+</sup> T cells that are negative for CD8-NPs. Quadrant 4 represents CD4<sup>-</sup> T cells that are negative for CD8-NPs. Representative plots for  $n = 4$  independent experiments. (B) Distribution of CD8-NPs in HD CD4<sup>-</sup> and CD4<sup>+</sup> T cells within a CD3<sup>+</sup> T cell population (the percent of CD8-NPs bound to CD4<sup>-</sup> T cells versus the percent of CD8-NPs bound to the CD4<sup>+</sup> T cells;  $n = 4$ ). (C) Percentage of HD CD4<sup>-</sup> and CD4<sup>+</sup> T cells within a CD3<sup>+</sup> T cell population that are positive for CD8-NPs ( $n = 4$ ). (B and C) Data are bar graphs representing the mean  $\pm$  standard deviation. Comparisons are made using paired Student's *t* test. (D) Flow cytometry gating strategy for determining non-specific binding of NPs (labeled with IgG antibody) for CD8<sup>+</sup> T cells. Cells were first gated based on the CD3<sup>+</sup> lymphocyte population (left). The unstained sample was then used to determine the quadrant gate placement for the CD4 stain and NP fluorescence (middle). A representative plot for the distribution of IgG-NPs in CD4<sup>-</sup> and CD4<sup>+</sup> T cells is shown on the right. Quadrant 1 represents the CD4<sup>-</sup> T cells that are positive for IgG-NPs. Quadrant 2 represents the CD4<sup>+</sup> T cells that are positive for IgG-NPs. Quadrant 3 represents CD4<sup>+</sup> T cells that are negative for IgG-NPs. Quadrant 4 represents CD4<sup>-</sup> T cells that are negative for IgG-NPs. Representative plots for  $n = 3$  independent experiments.

targeting memory T cells with CD45RO(A<sub>2A</sub>R)-NPs could ultimately facilitate tumor infiltration with this cytotoxic cell population.<sup>5</sup>

In order to determine the effect of CD45RO(A<sub>2A</sub>R)-NPs, activated HNSCC CD8<sup>+</sup> memory T cells were incubated with either CD45RO(A<sub>2A</sub>R)-NPs or CD45RO(scr)-NPs for 72–96 h and then were resuspended in a collagen gel that mimics the TME. A chemokine gradient was then formed over the cells with either CXCL10 only or CXCL10 and adenosine. Time lapse microscopy was then used to record the migration of these cells. Two point trajectories of the CD8<sup>+</sup> memory T cells treated with either CD45RO(scr)-NPs or CD45RO(A<sub>2A</sub>R)-NPs are depicted in Figure 5A and Figure 5B, respectively. Each trajectory represents the distance traveled by a single cell along the chemokine gradient in the *y*-direction and the Y-center of mass (Y-COM) reports the average distance traveled within a certain time frame.<sup>6</sup> We have previously shown that this parameter is a good indicator to quantify the effect of adenosine on T cell chemotaxis.<sup>6</sup> Furthermore, we have shown that HNSCC CD8<sup>+</sup> T cells are

very sensitive to adenosine; more than their healthy counterparts.<sup>6</sup> This difference in adenosine sensitivity was also observed in CD8<sup>+</sup> memory T cells where the inhibition of chemotaxis by adenosine was higher in CD8<sup>+</sup> memory T cells from HNSCC (70.9%  $\pm$  26.6%,  $n = 2$  patients) than from HD patients (16.2%  $\pm$  2.6%,  $n = 2$  patients; Figures S1A and S1B). We thus tested the effect of CD45RO(A<sub>2A</sub>R)-NPs on HNSCC CD8<sup>+</sup> memory T cell chemotaxis. In control experiments, adenosine inhibited the chemotaxis of CD8<sup>+</sup> memory T cells treated with CD45RO(scr)-NPs by 117%, as expected (Figure 5C). This inhibition of chemotaxis was comparable to the inhibition seen in untreated HNSCC CD8<sup>+</sup> memory T cells in the presence of CXCL10 + adenosine and comparable to the inhibition seen in HNSCC T cells in the presence of CXCL12 + adenosine, thus indicating that the inhibitory effect of adenosine on chemotaxis of HNSCC T cells does not differ because of the presence of NPs or the chemokine used (Figure S2).<sup>6,36</sup> In contrast to CD45RO(scr)-NPs, the inhibitory effect of adenosine was abrogated by CD45RO(A<sub>2A</sub>R)-NPs (Figures 5B and 5C). Overall, the percent

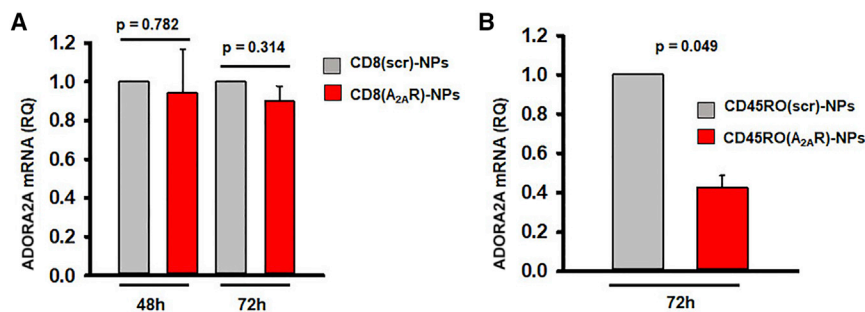

**Figure 3. *ADORA2A* siRNAs delivered via CD45RO-NPs knock down *ADORA2A* mRNA expression in CD8<sup>+</sup> memory T cells**

(A) RQ of *ADORA2A* mRNA expression in activated CD8<sup>+</sup> T cells 48–72 h post-incubation with CD8-NPs loaded with 200 pmol scr or *ADORA2A* siRNAs ( $n = 2$  for both time points). (B) RQ of *ADORA2A* mRNA expression in activated CD8 memory T cells 72 h post-incubation with CD45RO-NPs loaded with 200 pmol scramble or *ADORA2A* siRNAs ( $n = 2$ ). (A and B) 18S *rRNA* was used as reference gene. Data are represented as mean  $\pm$  standard deviation. Significance determined by paired Student's *t* test.

inhibition of the Y-COM in the presence of adenosine for cells treated with CD45RO(A<sub>2A</sub>R)-NPs (–35.0%) was significantly lower than cells treated with CD45RO(scr)-NPs (117%; Figure 5D). These data indicated that the CD45RO(A<sub>2A</sub>R)-NPs effectively reduced the sensitivity of HNSCC CD8<sup>+</sup> memory T cells to adenosine ultimately restoring their ability to chemotax in an adenosine-rich immunosuppressive microenvironment.

## DISCUSSION

The infiltration of CD8<sup>+</sup> T cells into solid tumors is important for a favorable prognosis and response to immunotherapies.<sup>2,3,5</sup> However, immunosuppressive components in the TME, such as adenosine, inhibit CD8<sup>+</sup> T cell motility and tumor infiltration.<sup>6,7</sup> Herein, we provide evidence that functionalized lipid NPs are able to effectively knock down A<sub>2A</sub>R in selective T cells subsets from HNSCC patients and increase the chemotactic ability of this subpopulation of cells in the presence of adenosine. These data show the therapeutic potentials of targeted NP delivery to block the inhibitory effect of the adenosine signaling pathway in cancer.

Immunotherapies targeting the adenosine signaling pathway have been thoroughly studied and show great clinical promise.<sup>11,14,17,18,22</sup> However, a targeted therapeutic approach could limit the side effects caused by the broad expression A<sub>2A</sub>R in a wide variety of cells and tissues.<sup>24–27</sup> While lipid NP-based drug-delivery formulations have been clinically approved for use in cancer therapy and viral vaccines, the use of lipid NPs has been associated with side effects such as complement activation, which can induce complement associated-pseudoallergy.<sup>30,37</sup> However, the formulation of lipid NPs that we used here is advantageous because the phospholipids are biocompatible, as they are present in the cell membrane.<sup>31</sup> Furthermore, NPs of similar lipid composition have been used *in vivo* in animal models with no reported side effects.<sup>32</sup> Still, the NPs we have used may present with limitations associated with the presence of polyethylene glycol (PEG) (used to stabilize the NPs and prolong their half-life *in vivo*) and streptavidin (SAV; used to facilitate the binding to biotinylated targeting antibodies). PEG can be recognized by anti-PEG antibodies that individuals may have developed by exposure to other pharmaceutical or cosmetic preparations.<sup>38</sup> Additionally, while the SAV-biotin non-covalent interaction is a widely used method for functionalization of nanomaterial, SAV has immunogenic properties and has been shown

to induce inflammatory cytokine expression *in vitro*.<sup>39,40</sup> Further *in vivo* toxicity studies will indicate if there is a need for chemical modifications of these NPs; however, there are viable avidin analogs, such as neutravidin and bradavidin II, that have less immunogenicity as compared to SAV.<sup>39,40</sup>

Herein, we established the basic initial requisites that functionalized NPs have to have in order to be considered as potential therapeutic options: specifically target a cell subset and be able to deliver intact contents in order to achieve the desired effects. Our results showed that CD45RO-NPs do indeed fulfil these requirements; CD8-NPs do not. While CD8-NPs were specific to CD8<sup>+</sup> T cells, they failed to knock down the A<sub>2A</sub>R. The inability of CD8-NPs to effectively decrease *ADORA2A* mRNA expression resulted from their rapid internalization in the lysosome, which does not allow enough time for NP disassembly in the endosome and endosomal escape of the siRNAs.<sup>41,42</sup> Furthermore, it has been shown that ligand-bound CD8 is poorly internalized both in unstimulated and activated T cells and is restricted to the membrane, which could add to the inability of CD8-NPs to deliver their siRNA contents.<sup>43,44</sup> Therefore, although there have been some accounts of using CD8 as a target for NPs, CD8 may not be the most effective targeting moiety when the encapsulated material needs to be delivered into the cells.<sup>45,46</sup>

While the CD8 receptor was ultimately a poor target, CD45RO-NPs fulfilled our intent. Targeting the CD45RO<sup>+</sup> T cells would be an effective alternative approach to targeting CD8<sup>+</sup> T cells since 90% of CD8<sup>+</sup> T cells that infiltrate tumors, especially in HNSCC, are CD8<sup>+</sup> memory T cells.<sup>5</sup> Additionally, CD45RO-NPs have already been characterized and validated.<sup>34</sup> We previously utilized these NPs for targeted knock-down of Kv1.3 channels in memory T cells and demonstrated that they specifically target memory T cells, are internalized by the cells, and exert their desired effects.<sup>34,35</sup> In the current study, when CD45RO-NPs were used instead of CD8-NPs, we showed that CD8<sup>+</sup> memory T cells treated with CD45RO(A<sub>2A</sub>R)-NPs decreased *ADORA2A* mRNA expression and, ultimately, blocked the inhibitory effect of adenosine on chemotaxis. The degree of chemotaxis inhibition observed *in vitro* in circulating CD8<sup>+</sup> T cells is a good marker of the ability of these cells to infiltrate the tumor as the two parameters are inversely correlated; i.e., patients whose circulating CD8<sup>+</sup> T cell

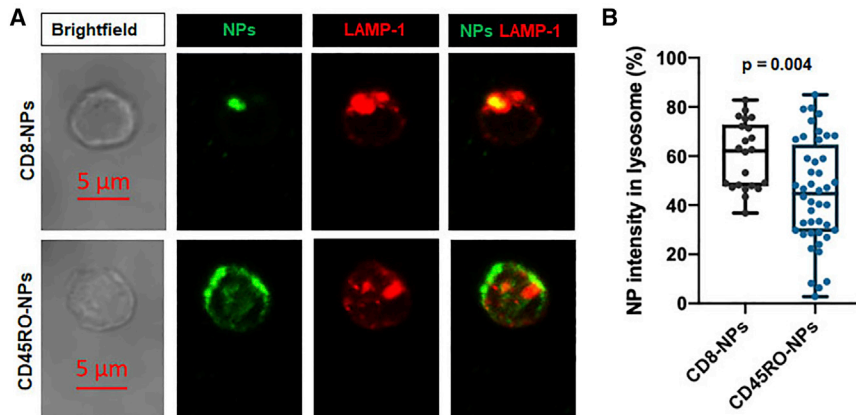

**Figure 4. CD8-NPs co-localize with the lysosome**

(A) Representative confocal images of an activated CD3<sup>+</sup> T cell incubated with CD8-NPs (top panel) and CD45RO-NPs (bottom panel) for 24 h. NPs visualized in green. Lysosomal marker LAMP-1 is visualized in red. Merge of NPs with LAMP-1 is shown with co-localization indicated by the presence of yellow. All images shown are shown at the same scale. (B) Single cell percentage of NP raw integrated density (NP intensity) in the lysosome as compared to total NP intensity in the cell. Approximately 20–45 cells were visualized from a total of two donors. Data represented as boxplots: line indicates the median; lower box is the 25<sup>th</sup> percentile; upper box is the 75<sup>th</sup> percentile; and whiskers represent the 10<sup>th</sup> and 90<sup>th</sup> percentiles. Each dot represents an individual cell. Significance determined by Mann-Whitney rank sum test.

chemotactic ability were most severely inhibited by adenosine *in vitro* are also those who had the lowest infiltration of CD8<sup>+</sup> T cells into the tumor.<sup>6</sup> Therefore, since the CD45RO(A<sub>2A</sub>R)-NPs rescued the chemotactic ability of CD8<sup>+</sup> memory T cells in the presence of adenosine, these cells may be better suited and better able to infiltrate the TME and, possibly, allows them to maintain their function in the TME. Overall, this study introduces a novel targeted therapy aimed to oppose the immunosuppressive nucleoside adenosine and restore T cell infiltration and function in the TME. Ultimately, further *in vivo* murine models will determine the efficacy of these NPs against cancerous tumors.

## MATERIALS AND METHODS

### Human subjects

HD whole blood was obtained from consenting donors or from discarded blood units obtained from Hoxworth Blood Center at the University of Cincinnati. HNSCC whole blood was obtained from 8 patients whose demographics and clinical features are summarized in Table 1. The eligibility for HNSCC patients for this study was determined by a tissue-biopsy-confirmed diagnosis of HNSCC and the absence of any treatment prior to the blood draw. Informed consent was obtained for both the HDs and HNSCC patients included in this study, and the study was approved by the University of Cincinnati Institutional Review Board (IRB # 2014-4755). Sample collection protocols were conducted in accordance with Good Clinical Practice guidelines and the Declaration of Helsinki. The data for HNSCC patients was managed using Research Electronic Data Capture tools (University of Cincinnati). Patient information from discarded blood units is not available.

### Reagents

Phosphate-buffered saline (PBS), RPMI-1640, penicillin, streptomycin, L-glutamine, fetal bovine serum, and HEPES were all obtained from Thermo Fisher. Human serum and adenosine were obtained from Millipore Sigma and the adenosine solution was prepared in sterile H<sub>2</sub>O. CXCL10 and CXCL12 were obtained from R&D systems and the stock solutions were prepared in PBS with 0.1% bovine serum albumin.

### Cell isolation

Whole blood from HNSCC patients and HDs was obtained and peripheral blood mononuclear cells were isolated using Ficoll-paque PLUS density gradient (GE Healthcare Biosciences) as described previously.<sup>6</sup> CD3<sup>+</sup>, CD8<sup>+</sup>, and CD8<sup>+</sup> memory T cells were each isolated by negative selection using commercially available kits (EasySep Enrichment kits, StemCell Technologies). The purities of these enriched T cell populations were determined using flow cytometry as indicated in Figure S3. T cells were maintained in T cell medium (RPMI-1640 medium containing L-glutamine supplemented with 200 U/mL penicillin, 200 mg/mL streptomycin, 1 mM L-glutamine, 10 mM HEPES, and 10% human serum) and then either remained unstimulated for 12–24 h (±NPs) or were activated in cell culture plates coated with 10 μg/mL anti-human CD3/CD28 antibodies (BioLegend) or 25 μL/mL ImmunoCult Human CD3/CD28 T Cell Activator (StemCell Technologies) for 72–96 h (±NPs) in the 37°C/5% CO<sub>2</sub> incubator as indicated in the following protocols.

### Transfection

Activated HD CD3<sup>+</sup> or CD8<sup>+</sup> T cells (either by plate bound antibodies or soluble activators; 1–6 × 10<sup>6</sup> cells per condition) were transfected using the Amaxa P3 Primary Cell 4D-Nucleofector X Kit L (Lonza Cologne GmbH) as indicated by the manufacturer's instructions. Briefly, 10 nM ADORA2A siRNAs (Ambion ADORA2A Silencer Select siRNA; ID: S1088; Thermo Fisher) or scr-RNAs (Ambion Silencer Select Negative Control #2 siRNA; Thermo Fisher) and pMaxGFP vector (2 μg; from Lonza Nucleofector kit) were added to the T cells and the samples were transfected in the 4-Nucleofector X Unit (Lonza) using the program "T cell, human, stimulated" (E0-E115). The transfected T cells were then incubated in T cell medium in the 37°C/5% CO<sub>2</sub> incubator for the indicated time points (24–72 h). Transfected cells were then used to determine A<sub>2A</sub>R mRNA and protein expression.

### Lipid NP production and functionalization

Lipid NPs (100 nm) were developed as previously described.<sup>34</sup> In brief, L-α-phosphatidylcholine, 1,2-distearoyl-snglycero-3-phosphoethanolamine-N-[biotinyl(polyethylene glycol)-2000] and

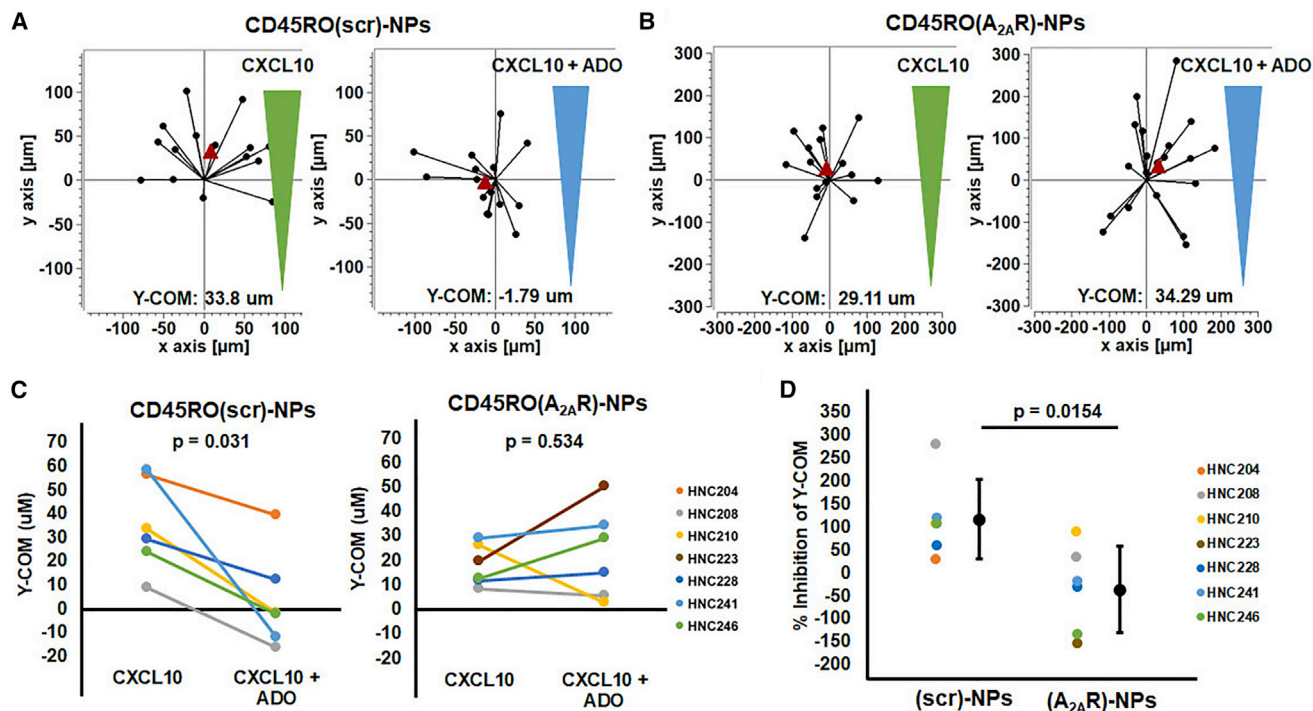

**Figure 5. CD45RO(A<sub>2A</sub>R)-NPs rescue the chemotactic ability of HNSCC CD8<sup>+</sup> memory T cells in the presence of adenosine**

(A and B) Representative two point trajectories of T cells migrating along the CXCL10 gradient (green) or CXCL10 + adenosine (ADO) gradient (blue) in HNSCC CD8<sup>+</sup> memory T cells treated with (A) CD45RO(scr)-NPs or (B) CD45RO(A<sub>2A</sub>R)-NPs. Trajectories artificially set to start at the origin with the red triangle representing the Y-COM. (C) Y-COM of HNSCC CD8<sup>+</sup> memory T cells treated with (left) CD45RO(scr)-NPs (n = 6) or (right) CD45RO(A<sub>2A</sub>R)-NPs (n = 6) in the presence of CXCL10 or CXCL10 + adenosine. Significance was determined using (left) a Wilcoxon signed rank test or (right) paired Student's t test. (D) Percent inhibition of Y-COM of HNSCC CD8<sup>+</sup> memory T cells in the presence of CXCL10 + adenosine compared to CXCL10 alone when treated with CD45RO(scr)-NPs (n = 6) compared to CD45RO(A<sub>2A</sub>R)-NPs (n = 6). Data are represented single dot plots (colored dots; wherein each dot represents a single donor) and as mean ± standard deviation (shown in black). Significance was determined using Student's t test.

cholesterol (Avanti Lipids) were mixed together, dried with nitrogen gas, and rehydrated with PBS. The mixture was shaken for 2 h at 37°C to form multilamellar vesicles (Barnstead Model: Max Q 4000, Thermo Fisher). The multilamellar vesicles were then sonicated (Fisherbrand Sonic Dismembrator Ultra Sonic liquid Processor Model: FB120) and extruded through a 100 nm filter (LIPEX Thermobarrel Extruder, Northern Lipids) to form unilamellar vesicles (ULVs). ULV size was then determined using the Nanoseries Zetasizer (Malvern Instruments) and labeled with appropriate antibodies for both fluorescence and cell targeting. ULVs were labeled with 10 µg/mL SAV conjugated with Alexa Fluor-488 or Alexa Fluor-647 (BioLegend) and 10 µg/mL biotin anti-human CD8 antibody (clone: MEM31, Genetex), 10 µg/mL biotin anti-human CD45RO antibody (clone: UCHL1; BioLegend), or 10 µg/mL biotin anti-human IgG Fc antibody (clone: HP6017; BioLegend). Once the ULVs were labeled, the unbound antibodies were removed using Sephrose CL-4B columns (GE Healthcare Life Sciences). The ULVs were then frozen at -80°C, lyophilized overnight (FreeZone2.5 lyophilizer, LabConco) and then stored at -80°C. ULVs are referred to as CD8-NPs, CD45RO-NPs, or IgG-NPs based upon antibody labeling.

#### Insertion of siRNAs into NPs and NP treatment of cells

For CD8-NP specificity and internalization experiments, at the time of experimentation, lyophilized CD8-NPs or IgG-NPs were reconstituted in 100 µL sterile H<sub>2</sub>O. HD CD8<sup>+</sup> T cells (0.3–1 × 10<sup>6</sup> cells at 2 × 10<sup>6</sup> cells/mL per condition) were resuspended in T cell medium and incubated with 50 µL of empty NPs (no siRNAs) and left unstimulated for 12–24 h in the 37°C/5% CO<sub>2</sub> incubator.

Alternatively, for experiments determining *ADORA2A* mRNA expression and T cell chemotaxis, the lyophilized CD8-NPs or CD45RO-NPs were reconstituted in 100 µL sterile H<sub>2</sub>O containing protamine-sulfate (20 µM; Sigma) and 200 pmol of *ADORA2A* siRNAs or scr-RNAs. HD CD8<sup>+</sup> or HD/HNSCC CD8<sup>+</sup> memory T cells (~0.3 × 10<sup>6</sup> cells at 2 × 10<sup>6</sup> cells/mL per condition) were resuspended in T cell medium and incubated with 50 µL of scr-RNA or *ADORA2A* siRNA-loaded CD8-NPs or CD45RO-NPs. CD8<sup>+</sup> T cells were treated with siRNA-loaded CD8-NPs and CD8<sup>+</sup> memory T cells were treated with siRNA-loaded CD45RO-NPs. Samples were then activated in cell culture plates coated with 10 µg/mL anti-CD3/CD28 antibodies in the 37°C/5% CO<sub>2</sub> incubator for up to 96 h.

**Table 1. Demographics and clinical table for HNSCC patients**

|                             | Value (%) |
|-----------------------------|-----------|
| Age (years)                 |           |
| Range                       | 48 to 75  |
| Mean                        | 60.6      |
| Gender                      |           |
| Male                        | 6 (75)    |
| Female                      | 1 (12.5)  |
| Unknown                     | 1 (12.5)  |
| Tumor Site                  |           |
| Oral cavity                 | 3 (37.5)  |
| Oropharynx                  | 4 (50)    |
| Unknown                     | 1 (12.5)  |
| Clinical stage              |           |
| T1                          | 3 (37.5)  |
| T2                          | 3 (37.5)  |
| T3                          | 1 (12.5)  |
| Unknown                     | 1 (12.5)  |
| Nodal status                |           |
| N0                          | 1 (12.5)  |
| N1                          | 4 (50)    |
| N2                          | 2 (25)    |
| Unknown                     | 1 (12.5)  |
| HPV status/P16 status       |           |
| Negative                    | 3 (37.5)  |
| Positive                    | 3 (37.5)  |
| Unknown                     | 2 (25)    |
| Smoking                     |           |
| Yes ( $\geq 10$ pack years) | 4 (50)    |
| No ( $< 10$ pack years)     | 3 (37.5)  |
| Unknown                     | 1 (12.5)  |
| Alcohol use                 |           |
| Yes ( $\geq 5$ drinks/week) | 2 (25)    |
| No ( $< 5$ drinks/week)     | 4 (50)    |
| Unknown                     | 2 (25)    |

HNSCC patients (n = 8) were enrolled in the study. Clinical stage from T1 to T3 refers to the size/extent of the tumors. Nodal status depicts the involvement of lymph nodes depending on their number and location.

### Flow cytometry

Flow cytometry was used to determine both A<sub>2A</sub>R protein expression post-transfection and CD8-NP specificity. A<sub>2A</sub>R expression post-transfection is as follows: activated HD CD3<sup>+</sup> or CD8<sup>+</sup> T cells transfected with scr or A<sub>2A</sub>R siRNAs were fixed with 1%–4% paraformaldehyde (Affymetrix, Thermo Fisher Scientific), permeabilized with BD Perm/Wash buffer (Fixation/Permeabilization Solution kit; BD Cytotfix/Cytoperm Plus, BD Biosciences) and then stained with anti-human anti-adenosine A<sub>2A</sub>R rabbit polyclonal antibody (Alomone labs) in BD Perm/Wash buffer followed by staining with a secondary anti-rabbit

antibody—either Alexa Fluor-647 conjugated donkey anti-rabbit antibody (Thermo Fisher) or Brilliant Violet 421 conjugated donkey anti-rabbit antibody (BioLegend). Specificity of the anti-adenosine A<sub>2A</sub>R rabbit polyclonal antibody was determined by peptide adsorption. Anti-human anti-adenosine A<sub>2A</sub>R rabbit polyclonal antibody (0.75  $\mu$ g) was incubated with 1.5  $\mu$ g A<sub>2A</sub>R blocking peptide (Alomone) at a 1:2 ratio (1.5  $\mu$ g peptide was added to 0.75  $\mu$ g antibody). CD3<sup>+</sup> T cells were fixed with 4% paraformaldehyde, permeabilized with 0.1% Triton X-100 (Millipore Sigma) and incubated with either the antibody alone or the antibody + peptide solution followed by incubation with Alexa Fluor 488 conjugated donkey anti-rabbit antibody.

CD8-NP specificity is as follows: resting HD CD3<sup>+</sup> T cells were incubated with Alexa Fluor 488-labeled empty CD8-NPs (or Alexa Fluor 647-labeled empty IgG-NPs as control) for 12–24 h as indicated above. The samples were then fixed with 1% paraformaldehyde and stained with an anti-human CD4 antibody (Alexa Fluor 700 conjugated anti-human CD4 antibody [clone: RPA-T4, BioLegend], PerCPCy5.5 anti-human CD4 antibody [clone: OKT4, BioLegend], or PE anti-human CD4 antibody [clone: A161A1; BioLegend; used with IgG-NPs]). All flow cytometry samples were run on a LSRII flow cytometer (BD Biosciences) and analyzed using FlowJo software (FlowJo).

### qRT-PCR

qRT-PCR was used to determine *ADORA2A* mRNA expression in activated HD CD3<sup>+</sup>/CD8<sup>+</sup> T cells after transfection and in activated HD CD8<sup>+</sup> and CD8<sup>+</sup> memory T cells after incubation with either siRNA-loaded CD8-NPs or CD45RO-NPs, respectively. The GFP-positive cell population (which indicated transfected cells) was not separated from non-transfected cells when measuring mRNA expression. Therefore, gene expression is a result from both transfected and non-transfected cells combined. The E.Z.N.A. total RNA isolation kit (Omega Biotek) was used to isolate total RNA from activated HD CD3<sup>+</sup>, CD8<sup>+</sup>, and CD8<sup>+</sup> memory T cells after transfection or after incubation with either siRNA-loaded CD8-NPs or CD45RO-NPs as described above. Complementary DNA (cDNA) was synthesized from at least 200 ng of total RNA per condition using the Maxima First Strand cDNA Synthesis Kit for qRT-PCR (Thermo Fisher) as per the manufacturer's instructions. qRT-PCR was then performed (as described in the manufacturer's instructions) in order to detect the gene expression of *ADORA2A*, *GAPDH*, and 18S *rRNA*. In brief, the qRT-PCR was assembled in a 96-well plate with each well having 10  $\mu$ L of 2 $\times$  TaqMan Gene Expression Master Mix (Applied Biosystems), 1  $\mu$ L of predesigned TaqMan Gene Expression Assay primer (A<sub>2A</sub>R: *ADORA2A* [assay ID: Hs00169123\_m1], *GAPDH* [assay ID: HS03929097\_g1], or 18S *rRNA* [assay ID: Hs99999901\_s1]; all primers from Applied Biosystems), and 9  $\mu$ L of diluted cDNA samples (diluted from 20  $\mu$ L to 170  $\mu$ L in sterile H<sub>2</sub>O). Each sample was prepared in technical replicates of four and the plate was run in Applied Biosystems StepOne Real-Time PCR System (Thermo Fisher) to obtain the C<sub>T</sub> values (StepOne software version 2.1). The  $\Delta$ C<sub>T</sub> value for each *ADORA2A* technical replicate was calculated by subtracting the average C<sub>T</sub> value of *GAPDH* or 18S *rRNA* from the C<sub>T</sub> value of each corresponding *ADORA2A* technical replicate. The difference between



the  $\Delta C_T$  value of the scr-RNA-treated sample and the  $\Delta C_T$  value of the corresponding *ADORA2A* siRNA-treated sample was then used to calculate the  $\Delta\Delta C_T$  values. Finally, the relative quantity (RQ) or fold change of *ADORA2A* mRNA expression in *ADORA2A* siRNA versus scr-RNA-treated samples was calculated as the  $2^{-\Delta\Delta C_T}$  value as described previously.<sup>6</sup>

### Immunofluorescence

Immunofluorescence was used to determine CD8-NP and CD45RO-NP localization in the lysosome. HD CD3<sup>+</sup> T cells were incubated with either Alexa Fluor 488 labeled empty CD8-NPs or CD45RO-NPs and activated for 24 h with soluble anti-CD3/CD28 antibodies. Cells were then plated on poly-L-lysine (Millipore Sigma) coated coverslips for at least 30 min in the 37°C/5% CO<sub>2</sub> incubator. Cells were fixed with 4% paraformaldehyde at room temperature for 30 min, permeabilized for 20 min at room temperature with PBS + 0.2% Triton-100X, and blocked with a solution of PBS containing 10% FBS for 1 h at room temperature, and lysosomes were stained with a monoclonal rabbit anti-human LAMP-1 antibody (clone D2D11, Cell Signaling Technology) diluted in the blocking solution for 2 h at room temperature. Cells were then washed with PBS and stained with Alexa Fluor 568 conjugated donkey anti-rabbit secondary antibody diluted in the blocking solution for 1 h at room temperature. All coverslips were washed and labeled with Alexa Fluor 647-conjugated rabbit anti-human CD8 alpha antibody (clone EP1150, Abcam) diluted in blocking solution for 2 h at room temperature. The coverslips were then washed and mounted on slides with Fluoromount G (Thermo Fisher). Images were then obtained with an inverted Zeiss LSM 710 microscope (Carl Zeiss Microscopy GmbH). Images were taken at 100× oil immersion lens at room temperature and the pinhole was set at 1 airy unit. Approximately 20–45 cells were obtained per condition. Percent of NP localization in the lysosome was determined using ImageJ (National Institutes of Health). A region of interest (ROI) was drawn around the entirety of the cell. The raw integrated density of NP signal within the total cell ROI was measured. A ROI was then drawn around the lysosome and the raw integrated density of NP signal within the lysosome ROI was measured. The percent of NP localization in the lysosome was determined by dividing raw integrated density of NP signal found inside the lysosome by the total cell raw integrated density of NP signal multiplied by 100.

### Chemotaxis

The effect of CD45RO(A<sub>2A</sub>R)-NPs on CD8<sup>+</sup> memory T cell chemotaxis was determined using u-Slide Chemotaxis assays (ibidi GmbH) as previously described.<sup>6</sup> This technique allows for 3D chemotaxis of T cells in a collagen matrix. In brief,  $0.2\text{--}0.6 \times 10^6$  activated HNSCC CD8<sup>+</sup> memory T cells were incubated with either scr or *ADORA2A* siRNA-loaded Alexa Fluor 488 labeled CD45RO-NPs overnight as indicated above. Each cell suspension was then centrifuged and washed to remove any unbound NPs and the samples were reactivated for a total activation time of 72–96 h. The cell samples were then resuspended in a gel containing rat tail collagen type I (Corning) and inserted into the center chamber portion of the u-Slide

as per the manufacturer's instructions. Migration medium was then inserted into the reservoir to the right of each center chamber. Migration medium plus 8 µg/mL CXCL10 was added to the left reservoir of one chamber forming a concentration gradient over the cells. In a separate chamber, in order to determine the effects of adenosine on migration, 1 µM adenosine (diluted in migration medium) plus 8 µg/mL CXCL10 was added to the left reservoir as previously indicated.<sup>6</sup> The inverted Zeiss LSM 710 microscope with a 37°C incubator was then used to perform time lapse microscopy with the u-Slide capturing images every 3 s up to a total of 1,000 images in both bright-field and 488 channels as described previously.<sup>6</sup> Two point manual cell tracking was performed using ImageJ software and was analyzed using the Chemotaxis and Migration Tool (ibidi GmbH). 10–20 cells were tracked per condition regardless of the presence of NP (Alexa Fluor 488) signal. The Y-COM, which is the average movement of the cells toward the chemokine in the y-direction, was measured as the chemotactic effect.<sup>6</sup> We also performed control chemotaxis experiments in non-nanoparticle treated HD and HNSCC CD8<sup>+</sup> memory T cells (Figure S1).

### Statistical analysis

Statistical analysis was performed using SigmaPlot 13.0 (Systat Software). Student's t tests, paired Student's t tests, or Mann-Whitney rank sum tests or Wilcoxon signed rank tests (when samples failed normality or had unequal variance) were used to compare samples as indicated in the figure legends. Statistical significance was defined by a p value of 0.05 or less.

### SUPPLEMENTAL INFORMATION

Supplemental information can be found online at <https://doi.org/10.1016/j.omtm.2021.03.001>.

### ACKNOWLEDGMENTS

We would like to acknowledge Dr. Heather Duncan for her aid with IRB regulatory affairs (Division of Nephrology, Department of Internal Medicine, University of Cincinnati) and the clinical coordinators for their assistance in patient sample collection (Clinical Trials Office, University of Cincinnati Cancer Center). We would like to thank Dr. Nancy Ratner for use of the 4-Nucleofector X Unit and Drs. Giovanni Pauletti and Gerald Kasting for use of the Zetasizer. Flow cytometry was performed at Shriner's Hospital for Children Flow Cytometry Core. 3D Chemotaxis and immunofluorescence were performed at the Live Microscopy Core in the Department of Pharmacology and Systems Physiology at the University of Cincinnati. Funding was provided by the National Cancer Institute (CA095286; L.C.) and the Brandon C. Gromada Head & Neck Cancer Foundation (L.C.). H.S.N. was supported by NCI T32CA117846 and University of Cincinnati Graduate Student URC Grant.

### AUTHOR CONTRIBUTIONS

H.S.N. designed and performed experiments, analyzed and interpreted the data, and wrote the manuscript. A.A.C. performed experiments and contributed to data analysis and manuscript preparation. M.J.A. performed experiments and analyzed data. T.M.W.-D. supervised

specimen procurement and provided expertise in HNSCC. L.C. supervised the design, analysis, and interpretation of the experiments, and wrote the manuscript. All the authors read and approved the final manuscript.

## DECLARATION OF INTERESTS

The authors declare no competing interests.

## REFERENCES

- Weninger, W., Biro, M., and Jain, R. (2014). Leukocyte migration in the interstitial space of non-lymphoid organs. *Nat. Rev. Immunol.* *14*, 232–246.
- Leffers, N., Gooden, M.J., de Jong, R.A., Hoogbeem, B.N., ten Hoor, K.A., Hollema, H., Boezen, H.M., van der Zee, A.G., Daemen, T., and Nijman, H.W. (2009). Prognostic significance of tumor-infiltrating T-lymphocytes in primary and metastatic lesions of advanced stage ovarian cancer. *Cancer Immunol. Immunother.* *58*, 449–459.
- Gooden, M.J., de Bock, G.H., Leffers, N., Daemen, T., and Nijman, H.W. (2011). The prognostic influence of tumour-infiltrating lymphocytes in cancer: a systematic review with meta-analysis. *Br. J. Cancer* *105*, 93–103.
- Ohta, A., Gorelik, E., Prasad, S.J., Ronchese, F., Lukashev, D., Wong, M.K., Huang, X., Caldwell, S., Liu, K., Smith, P., et al. (2006). A2A adenosine receptor protects tumors from antitumor T cells. *Proc. Natl. Acad. Sci. USA* *103*, 13132–13137.
- Chimote, A.A., Hajdu, P., Sfyris, A.M., Gleich, B.N., Wise-Draper, T., Casper, K.A., and Conforti, L. (2017). Kv1.3 channels mark functionally competent CD8+ tumor-infiltrating lymphocytes in head and neck cancer. *Cancer Res.* *77*, 53–61.
- Chimote, A.A., Balajthy, A., Arnold, M.J., Newton, H.S., Hajdu, P., Qualtieri, J., Wise-Draper, T., and Conforti, L. (2018). A defect in KCa3.1 channel activity limits the ability of CD8+ T cells from cancer patients to infiltrate an adenosine-rich microenvironment. *Sci. Signal.* *11*, eaq1616.
- Chimote, A.A., Hajdu, P., Kucher, V., Boiko, N., Kuras, Z., Szilagy, O., Yun, Y.H., and Conforti, L. (2013). Selective inhibition of KCa3.1 channels mediates adenosine regulation of the motility of human T cells. *J. Immunol.* *191*, 6273–6280.
- Blay, J., White, T.D., and Hoskin, D.W. (1997). The extracellular fluid of solid carcinomas contains immunosuppressive concentrations of adenosine. *Cancer Res.* *57*, 2602–2605.
- Sitkovsky, M.V., Lukashev, D., Apasov, S., Kojima, H., Koshiba, M., Caldwell, C., Ohta, A., and Thiel, M. (2004). Physiological control of immune response and inflammatory tissue damage by hypoxia-inducible factors and adenosine A2A receptors. *Annu. Rev. Immunol.* *22*, 657–682.
- Mandapathil, M. (2016). Adenosine-mediated immunosuppression in patients with squamous cell carcinoma of the head and neck. *HNO* *64*, 303–309.
- Leone, R.D., and Emens, L.A. (2018). Targeting adenosine for cancer immunotherapy. *J. Immunother. Cancer* *6*, 57.
- Kuras, Z., Yun, Y.H., Chimote, A.A., Neumeier, L., and Conforti, L. (2012). KCa3.1 and TRPM7 channels at the uropod regulate migration of activated human T cells. *PLoS ONE* *7*, e43859.
- Mandapathil, M., Szczepanski, M., Harasymczuk, M., Ren, J., Cheng, D., Jackson, E.K., Gorelik, E., Johnson, J., Lang, S., and Whiteside, T.L. (2012). CD26 expression and adenosine deaminase activity in regulatory T cells (Treg) and CD4(+) T effector cells in patients with head and neck squamous cell carcinoma. *OncoImmunology* *1*, 659–669.
- Whiteside, T.L. (2017). Targeting adenosine in cancer immunotherapy: a review of recent progress. *Expert Rev. Anticancer Ther.* *17*, 527–535.
- Mastelic-Gavillet, B., Navarro Rodrigo, B., Décombaz, L., Wang, H., Ercolano, G., Ahmed, R., Lozano, L.E., Ianaro, A., Derré, L., Valerio, M., et al. (2019). Adenosine mediates functional and metabolic suppression of peripheral and tumor-infiltrating CD8+ T cells. *J. Immunother. Cancer* *7*, 257.
- Sek, K., Kats, L.M., Darcy, P.K., and Beavis, P.A. (2020). Pharmacological and genetic strategies for targeting adenosine to enhance adoptive T cell therapy of cancer. *Curr. Opin. Pharmacol.* *53*, 91–97.
- Sitkovsky, M.V. (2020). Lessons from the A2A Adenosine Receptor Antagonist-Enabled Tumor Regression and Survival in Patients with Treatment-Refractory Renal Cell Cancer. *Cancer Discov.* *10*, 16–19.
- Vigano, S., Alatzoglou, D., Irving, M., Ménétrier-Caux, C., Caux, C., Romero, P., and Coukos, G. (2019). Targeting adenosine in cancer immunotherapy to enhance T-cell function. *Front. Immunol.* *10*, 925.
- Beavis, P.A., Milenkovski, N., Henderson, M.A., John, L.B., Allard, B., Loi, S., Kershaw, M.H., Stagg, J., and Darcy, P.K. (2015). Adenosine receptor 2A blockade increases the efficacy of anti-PD-1 through enhanced antitumor T-cell responses. *Cancer Immunol. Res.* *3*, 506–517.
- Allard, B., Allard, D., Buisseret, L., and Stagg, J. (2020). The adenosine pathway in immuno-oncology. *Nat. Rev. Clin. Oncol.* *17*, 611–629.
- Ma, S.R., Deng, W.W., Liu, J.F., Mao, L., Yu, G.T., Bu, L.L., Kulkarni, A.B., Zhang, W.F., and Sun, Z.J. (2017). Blockade of adenosine A2A receptor enhances CD8+ T cells response and decreases regulatory T cells in head and neck squamous cell carcinoma. *Mol. Cancer* *16*, 99.
- Fong, L., Hotson, A., Powderly, J.D., Szol, M., Heist, R.S., Choueiri, T.K., George, S., Hughes, B.G.M., Hellmann, M.D., Shepard, D.R., et al. (2020). Adenosine 2A receptor blockade as an immunotherapy for treatment-refractory renal cell cancer. *Cancer Discov.* *10*, 40–53.
- Lukashev, D.E., Smith, P.T., Caldwell, C.C., Ohta, A., Apasov, S.G., and Sitkovsky, M.V. (2003). Analysis of A2a receptor-deficient mice reveals no significant compensatory increases in the expression of A2b, A1, and A3 adenosine receptors in lymphoid organs. *Biochem. Pharmacol.* *65*, 2081–2090.
- Fredholm, B.B., IJzerman, A.P., Jacobson, K.A., Linden, J., and Müller, C.E. (2011). International Union of Basic and Clinical Pharmacology. LXXXI. Nomenclature and classification of adenosine receptors—an update. *Pharmacol. Rev.* *63*, 1–34.
- Chen, J.F., Eltzschig, H.K., and Fredholm, B.B. (2013). Adenosine receptors as drug targets—what are the challenges? *Nat. Rev. Drug Discov.* *12*, 265–286.
- Montesinos, M.C., Desai, A., Chen, J.-F., Yee, H., Schwarzschild, M.A., Fink, J.S., and Cronstein, B.N. (2002). Adenosine promotes wound healing and mediates angiogenesis in response to tissue injury via occupancy of A(2A) receptors. *Am. J. Pathol.* *160*, 2009–2018.
- Varani, K., Portaluppi, F., Merighi, S., Ongini, E., Belardinelli, L., and Borea, P.A. (1999). Caffeine alters A2A adenosine receptors and their function in human platelets. *Circulation* *99*, 2499–2502.
- Dolina, J.S., Sung, S.S., Novobrantseva, T.I., Nguyen, T.M., and Hahn, Y.S. (2013). Lipidoid Nanoparticles Containing PD-L1 siRNA Delivered In Vivo Enter Kupffer Cells and Enhance NK and CD8(+) T Cell-mediated Hepatic Antiviral Immunity. *Mol. Ther. Nucleic Acids* *2*, e72.
- Stephan, M.T., Stephan, S.B., Bak, P., Chen, J., and Irvine, D.J. (2012). Synapse-directed delivery of immunomodulators using T-cell-conjugated nanoparticles. *Biomaterials* *33*, 5776–5787.
- Bulbake, U., Doppalapudi, S., Kommineni, N., and Khan, W. (2017). Liposomal Formulations in Clinical Use: An Updated Review. *Pharmaceutics* *9*, E12.
- Grimaldi, N., Andrade, F., Segovia, N., Ferrer-Tasies, L., Sala, S., Veciana, J., and Ventosa, N. (2016). Lipid-based nanovesicles for nanomedicine. *Chem. Soc. Rev.* *45*, 6520–6545.
- Peer, D., Park, E.J., Morishita, Y., Carman, C.V., and Shimaoka, M. (2008). Systemic leukocyte-directed siRNA delivery revealing cyclin D1 as an anti-inflammatory target. *Science* *319*, 627–630.
- Khodoun, M., Chimote, A.A., Ilyas, F.Z., Duncan, H.J., Moncrieffe, H., Kant, K.S., and Conforti, L. (2020). Targeted knockdown of Kv1.3 channels in T lymphocytes corrects the disease manifestations associated with systemic lupus erythematosus. *Sci. Adv.* *6*, eabd1471.
- Hajdu, P., Chimote, A.A., Thompson, T.H., Koo, Y., Yun, Y., and Conforti, L. (2013). Functionalized liposomes loaded with siRNAs targeting ion channels in effector memory T cells as a potential therapy for autoimmunity. *Biomaterials* *34*, 10249–10257.
- Chimote, A.A., Hajdu, P., Kottyan, L.C., Harley, J.B., Yun, Y., and Conforti, L. (2016). Nanovesicle-targeted Kv1.3 knockdown in memory T cells suppresses CD40L expression and memory phenotype. *J. Autoimmun.* *69*, 86–93.

36. Wolff, H.A., Rolke, D., Rave-Fränk, M., Schirmer, M., Eicheler, W., Doerfler, A., Hille, A., Hess, C.F., Matthias, C., Rödel, R.M., and Christiansen, H. (2011). Analysis of chemokine and chemokine receptor expression in squamous cell carcinoma of the head and neck (SCCHN) cell lines. *Radiat. Environ. Biophys.* 50, 145–154.
37. Sercombe, L., Veerati, T., Moheimani, F., Wu, S.Y., Sood, A.K., and Hua, S. (2015). Advances and Challenges of Liposome Assisted Drug Delivery. *Front. Pharmacol.* 6, 286.
38. Lubich, C., Allacher, P., de la Rosa, M., Bauer, A., Prenninger, T., Horling, F.M., Siekmann, J., Oldenburg, J., Scheiflinger, F., and Reipert, B.M. (2016). The mystery of antibodies against polyethylene glycol (PEG)-what do we know? *Pharm. Res.* 33, 2239–2249.
39. Jain, A., and Cheng, K. (2017). The principles and applications of avidin-based nanoparticles in drug delivery and diagnosis. *J. Control. Release* 245, 27–40.
40. Jain, A., Barve, A., Zhao, Z., Jin, W., and Cheng, K. (2017). Comparison of avidin, neutravidin, and streptavidin as nanocarriers for efficient siRNA delivery. *Mol. Pharm.* 14, 1517–1527.
41. Alshehri, A., Grabowska, A., and Stolnik, S. (2018). Pathways of cellular internalisation of liposomes delivered siRNA and effects on siRNA engagement with target mRNA and silencing in cancer cells. *Sci. Rep.* 8, 1–9.
42. Dominska, M., and Dykxhoorn, D.M. (2010). Breaking down the barriers: siRNA delivery and endosome escape. *J. Cell Sci.* 123, 1183–1189.
43. Boyer, C., Auphan, N., Gabert, J., Blanc, D., Malissen, B., and Schmitt-Verhulst, A.-M. (1989). Comparison of phosphorylation and internalization of the antigen receptor/CD3 complex, CD8, and class I MHC-encoded proteins on T cells. Role of intracytoplasmic domains analyzed with hybrid CD8/class I molecules. *J. Immunol.* 143, 1905–1914.
44. Marsh, M., Parsons, I.J., Reid, P., and Pelchen-Matthews, A. (1993). Endocytic regulation of the T lymphocyte co-receptor proteins CD4 and CD8. *Biochem. Soc. Trans.* 21, 703–706.
45. Bicho, A., Peça, I.N., Roque, A.C., and Cardoso, M.M. (2010). Anti-CD8 conjugated nanoparticles to target mammalian cells expressing CD8. *Int. J. Pharm.* 399, 80–86.
46. Schmid, D., Park, C.G., Hartl, C.A., Subedi, N., Cartwright, A.N., Puerto, R.B., Zheng, Y., Maiarana, J., Freeman, G.J., Wucherpfennig, K.W., et al. (2017). T cell-targeting nanoparticles focus delivery of immunotherapy to improve antitumor immunity. *Nat. Commun.* 8, 1747.

**OMTM, Volume 21**

**Supplemental information**

**Targeted knockdown of the adenosine A<sub>2A</sub>  
receptor by lipid NPs rescues the chemotaxis  
of head and neck cancer memory T cells**

**Hannah S. Newton, Ameet A. Chimote, Michael J. Arnold, Trisha M. Wise-Draper, and Laura Conforti**

## Supplemental Material

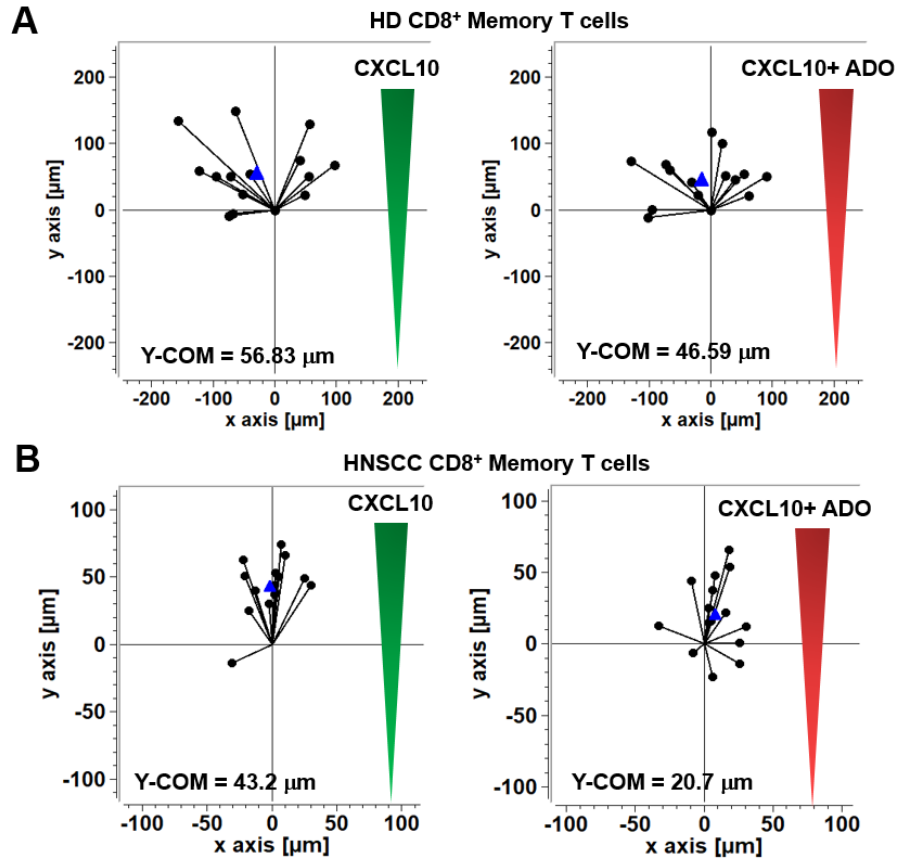

**Figure S1. Adenosine does not inhibit chemotaxis in HD CD8<sup>+</sup> memory T cells but does inhibit chemotaxis in HNSCC CD8<sup>+</sup> memory T cells. (A and B) Trajectories of CD8<sup>+</sup> memory T cells migrating along the CXCL10 gradient (green triangle) or CXCL10+adenosine (ADO) gradient (blue triangle) in (A) HD and (B) HNSCC samples. Trajectories are artificially set to start at the origin with the blue triangle representing the Y-COM. The same experiment was performed in CD8<sup>+</sup> memory T cells isolated from two independent HDs and two independent HNSCC patients. Shown here are the trajectories of migrating cells from a representative single HD and representative single HNSCC patient. Trajectories of 10-15 cells were calculated for each condition for each experiment.**

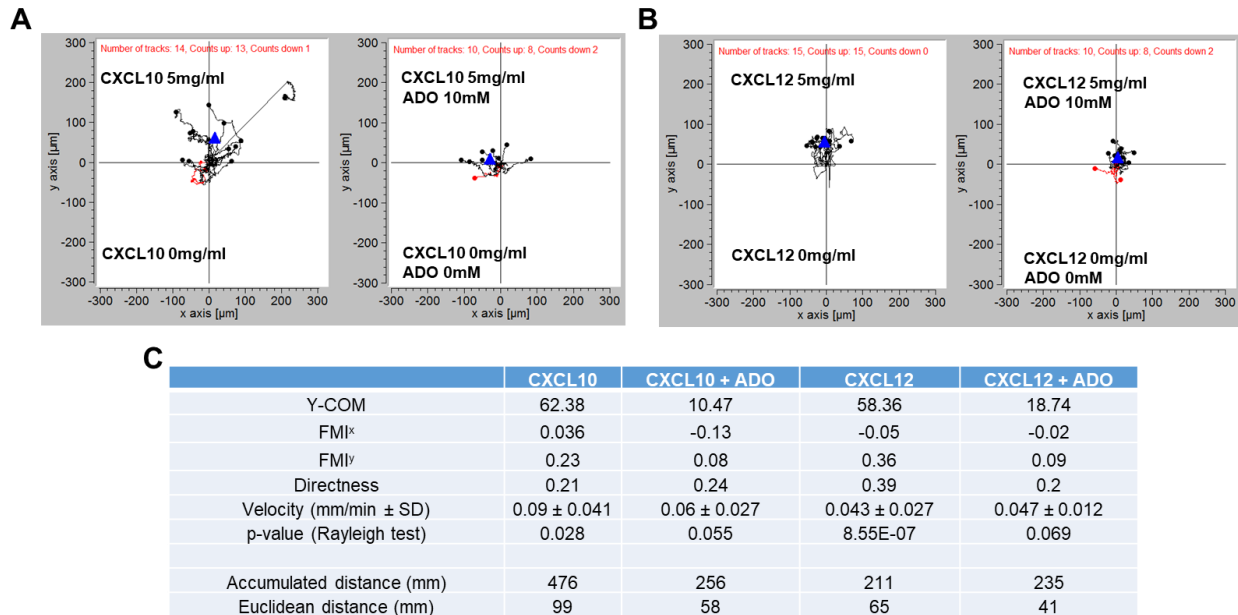

**Figure S2. The effect of adenosine is the same on T cell chemotaxis towards CXCL10 and CXCL12.** (A) Representative trajectories of T cells migrating along the CXCL10 gradient or CXCL10+adenosine (ADO) gradient in HD CD3<sup>+</sup> T cells. Trajectories are artificially set to start at the origin with the blue triangle representing the Y-COM. (B) Representative trajectories of T cells migrating along the CXCL12 gradient or CXCL12+adenosine (ADO) gradient in HD CD3<sup>+</sup> T cells. Trajectories are artificially set to start at the origin with the blue triangle representing the Y-COM. (C) Chemotactic parameters for HD CD3<sup>+</sup> T cells in migration media with CXCL10±ADO versus CXCL12±ADO. (n = 1 patient; 10-15 cells per condition).

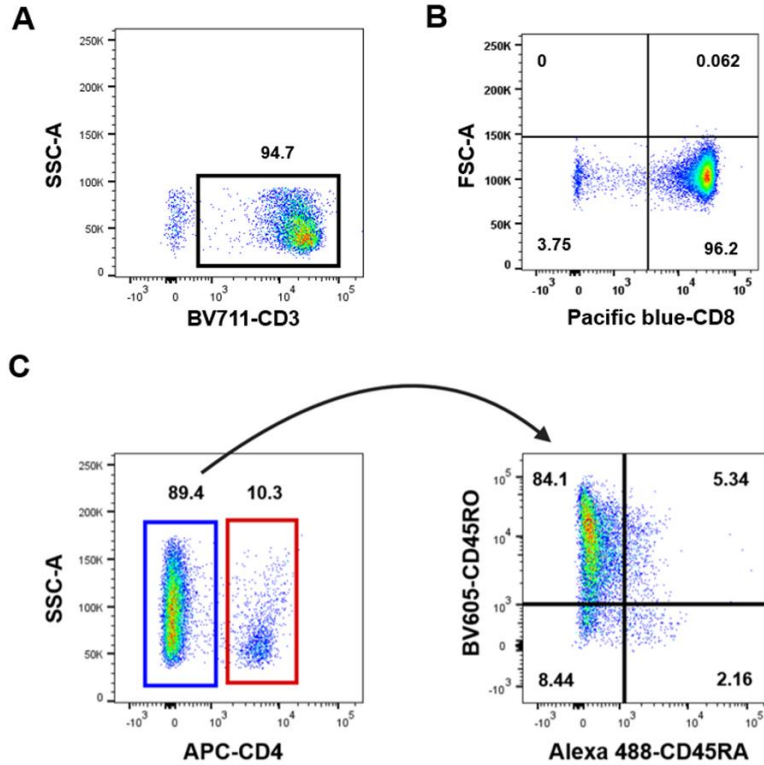

**Figure S3. Purity of T cell populations used in the study.** (A and B) CD3<sup>+</sup> and CD8<sup>+</sup> T cell populations were enriched by negative selection from HD PBMCs using EasySep Human T cell and Human CD8<sup>+</sup> T cell enrichment kits respectively (StemCell Technologies) as per the manufacturer's instructions. The purity of the enriched cell CD3<sup>+</sup> (A) and CD8<sup>+</sup> (B) T cell fractions were assessed by flow cytometry. (C) CD8<sup>+</sup> memory T cell population was enriched using the EasySep Human Memory CD8<sup>+</sup> T Cell Enrichment Kit (StemCell Technologies) as per the manufacturer's instructions. This kit enriches CD8<sup>+</sup> memory T cells (CD8<sup>+</sup>CD45RA<sup>-</sup>CD45RO<sup>+</sup>) from human PBMCs by targeting non-memory CD8<sup>+</sup> T cells for removal with antibodies recognizing specific cell surface markers. The CD8<sup>+</sup> memory T cell content in the enriched fraction was evaluated by flow cytometry and was defined as cells that were CD8<sup>+</sup>CD45RO<sup>+</sup>CD45RA<sup>-</sup>. In panel (C), the CD4<sup>-</sup> population from the enriched cells were defined as the CD8<sup>+</sup> population. All experiments were performed in two independent donors and shown here are representative scatter plots showing the purity of the enriched CD3<sup>+</sup>, CD8<sup>+</sup> and CD8<sup>+</sup> memory T cells from one HD.
